# Supplementary material for: Oral administration of LfcinB alleviates DSS-induced colitis by improving the intestinal barrier and microbiota
Source: Royal Society of Chemistry journal article supplement (doi:10.1039/d3fo05236b), 2024-01-01
Supplement: d3fo05236b1.xlsx [file d3fo05236b1.xlsx]

## Sheet: Figure 2
Figure. 2C Colon length
Con	Mod	LfcinB	Mod+LfcinB
7.7	3	5.8	4.2
6	2.8	6.3	5.2
7.6	3.2	6	6.3
7	2.7	7.3	5.5
6.7	2.8	7.5	5.7
7.1	4.5	6.5	5.3
5.8	3.7	6.6	5.5
Figure. 2D Mouse Body weight
Days	Con							Mod							LfcinB							Mod+LfcinB
Day 8	21.93	20.64	22.62	21.1	20.2	24.44	22.4	22.74	21.78	21.75	20.1	20.48	21.26	22.22	20.71	21.95	20.64	19.68	21.21	22.15	21.13	20.81	21.75	23.02	21.54	21.47	21.87	20.7
Day 9	22.99	20.92	22.18	20.19	21.53	24.82	22.61	23.39	22.59	22.05	20.64	21.88	20.64	22.59	22.78	20.99	21.06	20.28	23.11	21.37	21.39	20.98	20.45	20.79	22.24	21.93	21.24	21.44
Day 10	22.38	22.63	21.69	20.39	21.34	24.49	22.48	22.13	22.85	20.75	22.22	23.65	20.05	22.33	22.42	19.5	21.11	20.97	19.85	21.6	20.22	20.3	22.17	20.43	20.71	22.09	21.73	21.86
Day 11	21.68	23.08	22.8	21.57	20.5	24.99	22.98	22.12	22.83	23.72	21.11	20.51	22.98	22.3	21.08	20.96	23.35	21.8	23.21	22.21	20.36	22.22	22.6	22.02	22.21	21.98	23.37	21.53
Day 12	21.54	23.71	23.13	22.1	25.55	23.34	20.74	19.82	21.75	21.55	20.23	20.23	21.76	21.8	19	20.67	20.68	21.93	22.15	20.35	20.15	21.15	21.89	21.98	21.89	20.13	20.54	20.35
Day 13	21.97	25.85	23.7	23.48	23.27	21.33	20.57	20.16	20.7	20.08	20.48	19.07	19.33	19.04	23.32	20.26	22.92	21.27	22	21.16	22.09	19.74	19.74	20.86	20.25	20.75	20.93	21.24
Day 14	23.25	20.74	21.66	23.79	24.05	22.25	25.08	17.23	19.92	19.06	18.51	19.42	18.95	18.21	21.91	22.77	22.51	21.85	24.07	23.55	20.75	21.44	20.52	19.96	20.77	19.85	19.98	20.87
Figure. 2E DAI score
Days	Con																					Mod																					LfcinB
	Body weight							Occult							Stool formation							Body weight							Occult							Stool formation							Body weight
Day 8	0	0	0	0	0	0	0	0	0	0	0	0	0	0	0	0	0	0	0	0	0	0	0	0	0	0	0	0	0	0	0	0	0	0	0	0	0	0	0	0	0	0	0	0	0	0	0	0	0
Day 9	0	0	0	0	0	0	0	0	0	0	0	0	0	0	0	0	0	0	0	0	0	0	0	0	1	1	0	1	0	0	0	1	0	0	1	1	0	1	0	1	0	1	0	0	0	0	0	0	0
Day 10	0	0	0	0	0	0	0	0	0	0	0	0	0	0	0	0	0	0	0	0	0	1	2	0	1	1	2	1	0	0	1	0	0	1	1	1	1	1	1	0	0	1	0	0	0	0	0	0	0
Day 11	0	0	0	0	0	0	0	0	0	0	0	0	0	0	0	0	0	0	0	0	0	2	2	2	1	1	1	1	1	1	2	1	1	1	2	1	2	2	1	2	1	1	0	0	0	0	1	0	0
Day 12	0	0	0	0	0	0	0	0	0	0	0	0	0	0	0	0	0	0	0	0	0	2	2	3	3	1	1	1	1	3	1	3	2	1	2	1	2	2	3	2	2	1	0	0	0	0	0	0	0
Day 13	0	0	0	0	0	0	0	0	0	0	0	0	0	0	0	0	0	0	0	0	0	2	1	3	3	3	2	2	3	2	2	3	2	3	3	3	3	2	3	3	2	2	0	0	0	0	0	0	0
Day 14	0	0	0	0	0	0	0	0	0	0	0	0	0	0	0	0	0	0	0	0	0	3	3	3	3	3	2	3	2	2	2	3	3	1	3	3	3	2	3	2	3	3	0	0	0	0	0	0	0
Figure. 2F spleen index
Con	Mod	LfcinB	Mod+LfcinB
3.52	6.11	2.97	5.06
2.84	7.35	4.27	4.9
3.13	6	2.98	4.39
2.69	5.45	3.08	5.91
3.41	9.31	2.71	6.04
3.16	4.95	3.24	4.85
2.79	6.52	3.1	6.61
Figure. 2G liver index
Con	Mod	LfcinB	Mod+LfcinB
48.29	48.5	51.76	44.44
46.7	44.61	47.67	43.88
47.59	42.07	50.14	43.15
47.31	44.37	50.59	46.4
50.78	44.59	47.25	42.58
46.74	46.27	48.88	48.02
45.38	42.97	45.27	41.8
[truncated: 35 more columns]

## Sheet: Figure 3
Figure. 3A IL-1β (pg/ml )
Con	Mod	LfcinB	Mod+LfcinB
86	98	75	78
83	102	68	69
75	98	81	83
68	102	77	87
68	90	79	83
72	93	69	79
74	111	67	84
Figure. 3B IL-6 (pg/ml）
Con	Mod	LfcinB	Mod+LfcinB
345	445	339	415
325	451	315	388
351	441	329	394
339	450	327	381
342	418	341	358
328	469	338	421
301	471	317	409
Figure. 3C TNF-α (pg/ml)
Con	Mod	LfcinB	Mod+LfcinB
174	262	179	238
181	269	172	229
191	273	198	225
189	256	191	231
193	264	181	229
201	281	201	246
207	302	215	208
Figure. 3D IFN-γ (pg/ml)
Con	Mod	LfcinB	Mod+LfcinB
108	173	109	138
114	178	115	144
121	183	124	149
124	189	127	135
131	191	134	150
115	199	118	142
134	165	137	151
Figure. 3E IL-10 (pg/ml )
Con	Mod	LfcinB	Mod+LfcinB
73	58	75	69
78	51	73	62
81	49	82	55
88	55	88	68
91	49	81	73
83	67	92	77
95	52	101	71

## Sheet: Figure 4
Figure. 4B Serum DAO (U/ml)
Con	Mod	LfcinB	Mod+LfcinB
25	43	27	39
28	59	33	36
27	48	31	31
32	61	34	34
39	45	25	43
30	49	39	47
27	55	25	33
Figure. 4C Serum LPS (EU/L)
Con	Mod	LfcinB	Mod+LfcinB
32	55	20	41
35	73	28	49
29	58	25	45
23	69	24	48
21	57	29	43
27	69	18	39
22	71	33	51
Figure. 4D Serum D-LA (mmol/L)
Con	Mod	LfcinB	Mod+LfcinB
2.9	5.5	2.9	4.3
2.4	4.5	3.1	3.5
3.5	5.8	2.7	3.9
3.9	6.1	3.9	4.1
3.1	4.8	3.7	3.8
2.6	6.9	4.1	3.3
3.3	5.7	2.2	3.8

## Sheet: Figure 5
Quantitative results
Figure. 5B Relative fluorescence intensity of ZO-1
Con	Mod	LfcinB	Mod+LfcinB
0.996888	0.611662	1.00637	0.795291
0.993948	0.603772	1.01039	0.797347
0.996247	0.608833	1.01291	0.79549
1.00829	0.587706	0.999783	0.800087
1.00184	0.613762	1.01996	0.792595
1.00279	0.610579	1.02171	0.80643
Figure. 5D Occludin/GADPH
Con	Mod	LfcinB	Mod+LfcinB
0.835574	0.200828	0.982063	0.312846
0.832057	0.199699	0.970895	0.318951
0.827775	0.190138	0.97597	0.313593
0.696615	0.25033	0.807323	0.355232
0.701265	0.253228	0.812668	0.353663
0.703452	0.254521	0.806007	0.354953
Figure. 5E claudin-1/GADPH
Con	Mod	LfcinB	Mod+LfcinB
0.6517	0.135853	0.534555	0.366971
0.64969	0.139364	0.538289	0.373351
0.651945	0.137845	0.540085	0.368078
0.648633	0.09074	0.512596	0.476835
0.648568	0.098061	0.516813	0.483973
0.651015	0.091144	0.516927	0.485494
Figure. 5F ZO-1/GADPH
Con	Mod	LfcinB	Mod+LfcinB
0.850963	0.176466	0.891548	0.707634
0.837108	0.176634	0.879985	0.707085
0.853102	0.170116	0.887365	0.703597
0.95982	0.497129	1.06903	0.821662
0.963205	0.48565	1.05654	0.828724
0.964825	0.497412	1.07188	0.822512

## Sheet: Figure 6
Figure. 6B Rations of AB-PAS positive cell(%)
Con	Mod	LfcinB	Mod+LfcinB
11.976	4.426	10.104	9.081
8.417	7.302	9.321	6.547
9.322	5.494	12.287	5.815
11.605	6.306	9.636	7.498
9.917	5.769	11.422	4.873
9.92	6.02	11.142	7.118
11.577	5.827	9.57	8.222
9.842	5.632	9.749	8.812
10.821	6.131	10.155	6.795
9.143	5.063	10.048	7.494
Figure. 6C Cell apoptotic index
Con	Mod	LfcinB	Mod+LfcinB
7.271	15.09	6.756	8.107
3.692	13.712	5.369	8.824
6.956	13.506	6.803	9.791
4.875	13.733	4.688	8.237
5.394	17.56	6.078	8.31
7.198	20.561	4.612	10.913
4.335	15.264	6.044	9.899
4.809	17.306	4.54	8.825
6.158	13.249	4.698	7.641
4.441	15.646	6.893	7.207
Figure. 6D Neutrophilic granulocyte invasion index
Con	Mod	LfcinB	Mod+LfcinB
4.643	8.721	3.752	6.198
4.084	8.763	3.031	5.907
4.577	11.947	2.831	6.409
3.279	12.58	1.713	6.669
4.97	11.167	3.422	6.757
3.283	7.236	3.731	6.112
3.4	10.148	3.281	6.721
2.336	14.769	2.141	5.678
4.234	10.043	2.375	5.761
3.305	8.297	2.015	7.72
Figure. 6E Macrophage invasion index
Con	Mod	LfcinB	Mod+LfcinB
6.493	11.675	5.937	9.455
3.516	14.463	5.536	7.945
3.976	12.708	4.319	7.923
4.564	15.928	4.096	9.347
3.645	13.526	4.203	7.086
6.535	14.039	5.989	7.673
6.203	13.175	4.606	8.967
6.164	17.426	5.162	7.523
5.205	10.625	4.834	8.119
4.225	11.271	6.503	9.492

## Sheet: Figure 7
Western Blotting Quantitative results
Figure. 7B PP65/P65
Con	Mod	LfcinB	Mod+LfcinB
0.307973	1.04239	0.225912	0.2366
0.295392	0.917246	0.203788	0.190216
0.310572	1.06444	0.224943	0.236
0.289617	0.903108	0.204516	0.200231
0.31377	1.04507	0.223529	0.232113
0.28989	0.91853	0.214003	0.198637
Figure. 7C PERK/ERK
Con	Mod	LfcinB	Mod+LfcinB
0.941097	1.41228	0.548792	1.35235
1.07042	1.58638	0.573476	1.35186
0.961562	1.56779	0.564385	1.37442
0.635304	1.16892	0.745496	1.5421
0.647079	1.15689	0.782161	1.55285
0.608886	1.056	0.791745	1.59625
Figure. 7D PJNK/JNK
Con	Mod	LfcinB	Mod+LfcinB
0.675491	1.15272	0.975195	0.774483
0.683863	1.15272	0.97272	0.774784
0.676264	1.14895	0.978606	0.797508
0.905816	0.984904	0.930983	1.07735
0.893954	0.993161	0.94405	1.08417
0.906537	0.992808	0.905593	1.06836
Figure. 7E pp38/p38
Con	Mod	LfcinB	Mod+LfcinB
1.0164	1.28071	0.963349	1.10118
1.0313	1.34127	0.961861	1.10358
1.02043	1.37896	0.977316	1.10748
1.20963	1.26788	0.883829	0.822654
1.20313	1.4337	0.86761	0.870744
1.14746	1.45411	0.853139	0.844848

## Sheet: Figure 8
Relative abundance of species at the phylum level
	Con3	Con6	Con1	Con5	Con2	Con4	Mod4	Mod3	Mod1	Mod6	Mod2	Mod5	LfcinB_Mod1	LfcinB_Mod6	LfcinB_Mod3	LfcinB_Mod2	LfcinB_Mod5	LfcinB_Mod4
Latescibacteria	0	0	0	0	0	0	0	0	0	0	0	0	2.25367e-05	1.83658e-05	0	0	0	0
Nitrospirae	0	0	0	0	0	0	0	0	0	0	0	0	0	1.83658e-05	2.22015e-05	1.90847e-05	2.06782e-05	0
Acidobacteria	0	0	0	0	0	0	0	0	0	0	0	0	4.50735e-05	3.67316e-05	8.8806e-05	3.81694e-05	8.2713e-05	5.50641e-05
Chloroflexi	0	0	0	0	0	0	0	0	0	0	0	0	4.50735e-05	7.34632e-05	6.66045e-05	0.000152678	0.000165426	9.17734e-05
Fibrobacteres	2.42689e-05	1.8905e-05	2.39785e-05	1.94182e-05	1.94955e-05	0	8.06842e-05	5.06586e-05	6.75569e-05	9.2844e-05	2.01906e-05	2.23449e-05	6.76102e-05	5.50974e-05	0	1.90847e-05	4.13565e-05	1.83547e-05
Tenericutes	4.85378e-05	0.00015124	0	0	0	0	2.01711e-05	2.53293e-05	4.50379e-05	4.6422e-05	0.000100953	8.93795e-05	2.25367e-05	0	4.4403e-05	0	2.06782e-05	3.67094e-05
Spirochaetes	2.42689e-05	0	0	0.000135928	5.84864e-05	0	4.03421e-05	2.53293e-05	0	0.000116055	0	2.23449e-05	0	3.67316e-05	2.22015e-05	1.90847e-05	0.000103391	3.67094e-05
Fusobacteria	0.000315496	0.000207955	0.000143871	0.000291273	0.00021445	0.000216612	0.000262224	0.000278622	0.00022519	0.000417798	0.000262478	0.000424553	0.000247904	0.000275487	0.000133209	7.63388e-05	0.000227461	0.000146837
Deferribacteres	0.000752336	0	0.00107903	1.94182e-05	3.89909e-05	0	0.000302566	0.00334347	0.00135114	0.000719541	0.00032305	0.000692691	0.000180294	0	8.8806e-05	0	2.06782e-05	1.83547e-05
Cyanobacteria	0.000922218	0.000945251	0.0013428	0.00168939	0.00122821	0.00116183	0.00135146	0.00174772	0.00155381	0.00192651	0.00153449	0.00122897	0.00137474	0.000624438	0.00104347	0.00101149	0.00175765	0.0011747
Actinobacteria	0.00298507	0.011343	0.000983119	0.0183114	0.010703	0.0144146	0.00159351	0.00331814	0.00267976	0.00250679	0.00310935	0.0034858	0.00137474	0.00154273	0.00226455	0.0018703	0.00223325	0.00262472
Candidatus_Saccharibacteria	0.0145371	0.0636532	0.0138836	0.0626626	0.0690724	0.0364696	0.00510328	0.00592705	0.0100209	0.00487431	0.00882329	0.00377628	0.00946543	0.00692391	0.00828116	0.0154968	0.0225393	0.0278991
Verrucomicrobia	0.00594588	0.00625756	0.00362076	0.0263894	0.0077397	0.015537	0.014503	0.0653495	0.0060576	0.0335167	0.0131643	0.00887091	0.00495808	0.0776874	0.055859	0.117466	0.011311	0.214566
Proteobacteria	0.14872	0.109384	0.0539996	0.227096	0.196046	0.17837	0.105817	0.0964539	0.166325	0.138082	0.0908981	0.0924631	0.0458623	0.0625172	0.122397	0.0432841	0.178867	0.0579641
Bacteroidetes	0.217085	0.00251437	0.21468	0.00407783	0.00393808	0.00456855	0.0843957	0.350431	0.534308	0.476174	0.0825392	0.257592	0.445213	0.000991754	0.00874739	0.00488568	0.00438379	0.00168863
Firmicutes	0.608349	0.804749	0.709884	0.658977	0.710648	0.748671	0.786147	0.47267	0.277141	0.340854	0.799063	0.630639	0.490174	0.848721	0.799742	0.814363	0.777543	0.690412
Others	0.000291227	0.000775106	0.000359678	0.00033011	0.000292432	0.000590761	0.00038325	0.000379939	0.00022519	0.000673119	0.000161525	0.000692691	0.000946543	0.000477511	0.00119888	0.00129776	0.000682382	0.00326713
Relative abundance of species at the genus level
	Con3	Con6	Con1	Con5	Con2	Con4	Mod4	Mod3	Mod1	Mod6	Mod2	Mod5	LfcinB_Mod1	LfcinB_Mod6	LfcinB_Mod3	LfcinB_Mod2	LfcinB_Mod5	LfcinB_Mod4
Helicobacter	0.0274724	0.00026467	0.027935	0.000213601	0.000233945	0.000216612	0.00272309	0.0125887	0.0135114	0.00933083	0.00238249	0.0065247	0.00202831	5.50974e-05	0.000266418	0.000114508	0.000103391	0
Turicibacter	0.00567892	0.00011343	0.00398043	0.0328168	0.0267478	0.00799496	0.00100855	0.000430598	0.000517936	0.00116055	0.00593604	0.00113959	0.000292978	0.00165292	0.000510635	0.00206115	0.00246071	0.00240446
Flavonifractor	0.015071	0.000775106	0.0118933	0.0012816	0.00261239	0.00348549	0.00937954	0.0143617	0.00934537	0.0182439	0.0122355	0.0232387	0.00448481	0.00034895	0.00699347	0.000400779	0.00483871	0.000201902
Oscillibacter	0.0172552	0.000453721	0.0201659	0.000601965	0.00101376	0.000846757	0.0127481	0.0156282	0.0121152	0.0208899	0.0107818	0.0125355	0.0114036	0.00022039	0.00703788	0.000133593	0.00219189	0.000183547
Alistipes	0.00963475	0.00015124	0.0260646	0.000194182	7.79818e-05	9.84601e-05	0.00391318	0.0125633	0.0388903	0.0375322	0.00535051	0.0126695	0.0147165	3.67316e-05	0.000799254	0.000133593	8.2713e-05	5.50641e-05
Lactobacillus	0.0141973	0.0430845	0.00587474	0.0205833	0.0316996	0.0349927	0.00238018	0.00159574	0.00220686	0.0016944	0.00205944	0.00176524	0.0011043	0.00102849	0.00213134	0.000419863	0.002378	0.00108293
Pseudoflavonifractor	0.0229341	0.000964156	0.0074813	0.00248553	0.00382111	0.0017329	0.00619251	0.0489108	0.0111019	0.0258106	0.011226	0.0215405	0.00948797	0.000716267	0.01543	0.000381694	0.0206162	0.000201902
Allobaculum	0.0102415	0.00206065	0.00117495	0.0591285	0.0190861	0.0112835	0.00411489	0.0108916	0.0103812	0.0219112	0.00316992	0.0195071	0.00556657	0.00409558	0.00861418	0.00103057	0.0079818	0.00273485
Clostridium_IV	0.00980464	0.0144245	0.00676194	0.0187386	0.0199828	0.0171124	0.0137163	0.00357143	0.00695836	0.00570991	0.0138709	0.00958595	0.00615253	0.00385682	0.0142534	0.0433413	0.00510753	0.00699314
Lachnospiracea_incertae_sedis	0.0139061	0.0190752	0.0221561	0.0125053	0.0200218	0.0376905	0.00992416	0.0119048	0.00707096	0.00434046	0.0611169	0.00927312	0.00380871	0.0063913	0.0111008	0.00208023	0.0292597	0.00361587
Escherichia	0	0	4.7957e-05	3.88365e-05	5.84864e-05	1.9692e-05	0.0163789	0.0480243	0.123426	0.0855326	0.00442174	0.0337854	0.0114712	0.000404048	0.00248657	7.63388e-05	0.00177833	0.00161521
Saccharibacteria	0.0145371	0.0636532	0.0138836	0.0626626	0.0690724	0.0364696	0.00510328	0.00592705	0.0100209	0.00487431	0.00882329	0.00377628	0.00946543	0.00692391	0.00828116	0.0154968	0.0225393	0.0278991
Barnesiella	0.107244	0.000604961	0.0702091	0.00172822	0.00185207	0.00204797	0.0232976	0.114184	0.131443	0.0927512	0.00288726	0.0735817	0.0418282	0.000202024	0.00248657	0.00127867	0.00140612	0.000348739
Akkermansia	0.00594588	0.00625756	0.00362076	0.0263894	0.0077397	0.015537	0.014503	0.0653495	0.0060576	0.0335167	0.0131643	0.00887091	0.00495808	0.0776874	0.055859	0.117466	0.011311	0.214566
Bacteroides	0.00225701	0.000245765	0.00398043	0.000485456	0.000526377	0.000452916	0.0393537	0.162335	0.314568	0.28647	0.0523138	0.139924	0.316281	0.000257121	0.00199814	0.000687049	0.00119934	0.000458867
Desulfovibrio	0.117534	0.107267	0.0228755	0.224475	0.193005	0.176362	0.0787478	0.0177305	0.0165965	0.0151568	0.0754725	0.036221	0.0214324	0.0594869	0.114671	0.0420818	0.173118	0.0543482
Clostridium_XlVa	0.102876	0.297886	0.282131	0.159909	0.111397	0.0993265	0.373951	0.164742	0.0811133	0.0704222	0.345784	0.202869	0.145024	0.423865	0.379512	0.297702	0.212242	0.153005
Others	0.50341	0.442718	0.469763	0.375762	0.491052	0.55433	0.382564	0.28926	0.204675	0.264652	0.369003	0.383192	0.390494	0.412772	0.367568	0.475114	0.501385	0.530285

## Sheet: Figure 8H
Relative abundance values of species at phylum and genus level
	Con3	Con6	Con1	Con5	Con2	Con4	Mod4	Mod3	Mod1	Mod6	Mod2	Mod5	LfcinB+Mod1	LfcinB+Mod6	LfcinB+Mod3	LfcinB+Mod2	LfcinB+Mod5	LfcinB+Mod4
Clostridium_IV	0.00980464	0.0144245	0.00676194	0.0187386	0.0199828	0.0171124	0.0137163	0.00357143	0.00695836	0.00570991	0.0138709	0.00958595	0.00615253	0.00385682	0.0142534	0.0433413	0.00510753	0.00699314
Lachnospiracea_incertae_sedis	0.0139061	0.0190752	0.0221561	0.0125053	0.0200218	0.0376905	0.00992416	0.0119048	0.00707096	0.00434046	0.0611169	0.00927312	0.00380871	0.0063913	0.0111008	0.00208023	0.0292597	0.00361587
Saccharibacteria	0.0145371	0.0636532	0.0138836	0.0626626	0.0690724	0.0364696	0.00510328	0.00592705	0.0100209	0.00487431	0.00882329	0.00377628	0.00946543	0.00692391	0.00828116	0.0154968	0.0225393	0.0278991
Barnesiella	0.107244	0.000604961	0.0702091	0.00172822	0.00185207	0.00204797	0.0232976	0.114184	0.131443	0.0927512	0.00288726	0.0735817	0.0418282	0.000202024	0.00248657	0.00127867	0.00140612	0.000348739
Akkermansia	0.00594588	0.00625756	0.00362076	0.0263894	0.0077397	0.015537	0.014503	0.0653495	0.0060576	0.0335167	0.0131643	0.00887091	0.00495808	0.0776874	0.055859	0.117466	0.011311	0.214566
Bacteroides	0.00225701	0.000245765	0.00398043	0.000485456	0.000526377	0.000452916	0.0393537	0.162335	0.314568	0.28647	0.0523138	0.139924	0.316281	0.000257121	0.00199814	0.000687049	0.00119934	0.000458867
Clostridium_XlVa	0.102876	0.297886	0.282131	0.159909	0.111397	0.0993265	0.373951	0.164742	0.0811133	0.0704222	0.345784	0.202869	0.145024	0.423865	0.379512	0.297702	0.212242	0.153005
Candidatus_Saccharibacteria	0.0145371	0.0636532	0.0138836	0.0626626	0.0690724	0.0364696	0.00510328	0.00592705	0.0100209	0.00487431	0.00882329	0.00377628	0.00946543	0.00692391	0.00828116	0.0154968	0.0225393	0.0278991
Verrucomicrobia	0.00594588	0.00625756	0.00362076	0.0263894	0.0077397	0.015537	0.014503	0.0653495	0.0060576	0.0335167	0.0131643	0.00887091	0.00495808	0.0776874	0.055859	0.117466	0.011311	0.214566
Bacteroidetes	0.217085	0.00251437	0.21468	0.00407783	0.00393808	0.00456855	0.0843957	0.350431	0.534308	0.476174	0.0825392	0.257592	0.445213	0.000991754	0.00874739	0.00488568	0.00438379	0.00168863
Proteobacteria	0.14872	0.109384	0.0539996	0.227096	0.196046	0.17837	0.105817	0.0964539	0.166325	0.138082	0.0908981	0.0924631	0.0458623	0.0625172	0.122397	0.0432841	0.178867	0.0579641
Firmicutes	0.608349	0.804749	0.709884	0.658977	0.710648	0.748671	0.786147	0.47267	0.277141	0.340854	0.799063	0.630639	0.490174	0.848721	0.799742	0.814363	0.777543	0.690412
Escherichia	0	0	4.7957e-05	3.88365e-05	5.84864e-05	1.9692e-05	0.0163789	0.0480243	0.123426	0.0855326	0.00442174	0.0337854	0.0114712	0.000404048	0.00248657	7.63388e-05	0.00177833	0.00161521
evn	Con3	Con6	Con1	Con5	Con2	Con4	Mod4	Mod3	Mod1	Mod6	Mod2	Mod5	LfcinB+Mod1	LfcinB+Mod6	LfcinB+Mod3	LfcinB+Mod2	LfcinB+Mod5	LfcinB+Mod4
DAI	0	0	0	0	0	0	3	2.33	2.67	2.67	2.67	3	1.33	1	1.33	1.66	1.33	1.33
Colon length	7.7	6	7.6	7	6.7	7.1	3	2.8	3.2	2.7	2.8	3.7	4.2	5.2	6.3	5.5	5.7	5.5
BW	23.25	20.74	21.66	23.79	24.05	25.08	17.23	18.21	19.06	18.51	19.42	18.95	21.44	20.52	19.96	19.85	19.98	19.87
Liver index	0.05029	0.0487	0.04959	0.04731	0.05078	0.04738	0.0485	0.04461	0.04107	0.04437	0.04359	0.04627	0.04444	0.04388	0.0464	0.04802	0.0418	0.04315
Spleen index	0.00352	0.00284	0.00313	0.00269	0.00341	0.00316	0.00611	0.00735	0.006	0.00931	0.00652	0.00545	0.00506	0.0049	0.00439	0.00591	0.00604	0.00661
IL-1β	86	83	75	68	68	72	98	102	98	102	93	111	77	78	69	83	84	79
IL-6	345	325	351	339	342	328	451	441	445	471	469	450	415	388	394	381	358	409
TNF-α	174	181	191	189	193	201	262	269	273	256	264	302	238	229	225	231	208	246
IFN-γ	108	114	121	124	131	115	173	178	183	189	191	199	138	144	149	150	151	142
IL-10	73	78	81	88	91	83	58	51	49	55	49	52	62	69	55	68	73	77
D-LA	2.9	2.4	3.5	3.9	3.1	3.3	5.5	4.5	5.8	6.1	6.9	5.7	4.3	3.5	3.9	4.1	3.8	3.3
LPS	32	35	29	23	27	21	55	73	58	69	69	71	41	49	45	48	43	39
DAO	25	28	27	32	30	27	59	48	61	45	49	55	39	36	31	34	43	33
Cell apoptotic index	3.692	4.875	4.335	4.809	4.441	5.394	15.09	15.264	20.561	17.306	15.646	13.249	7.641	7.207	8.107	8.237	8.31	8.824
Macrophage invasion index	3.516	3.976	3.645	4.225	4.564	5.205	11.675	14.463	12.708	15.928	17.426	14.039	9.455	7.945	7.923	7.523	7.673	8.119
Neutrophilic granulocyte invasion index	4.463	4.084	4.577	3.4	3.305	3.283	8.721	11.947	12.58	11.167	7.236	14.796	6.198	5.907	6.409	6.112	6.721	5.761
